# Supplementary material
Source: publisher figshare collection journal article supplement (https://future-science-group.figshare.com/ndownloader/files/28089567)

**Supplementary Figure 4**. Overall survival (a) and progression-free survival (b), stratified by prior anti-VGEF therapy.

(a)


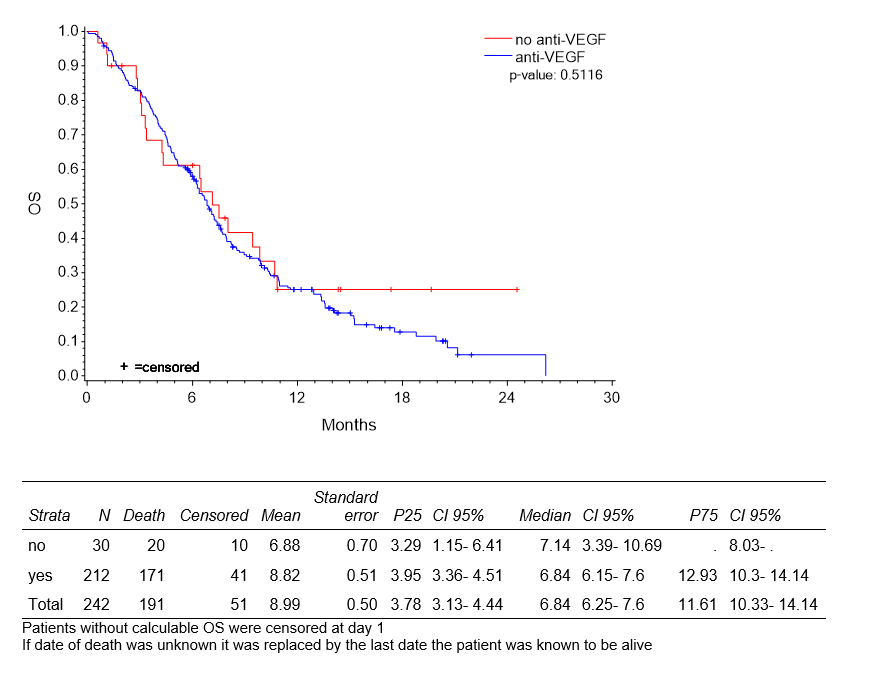


(b)


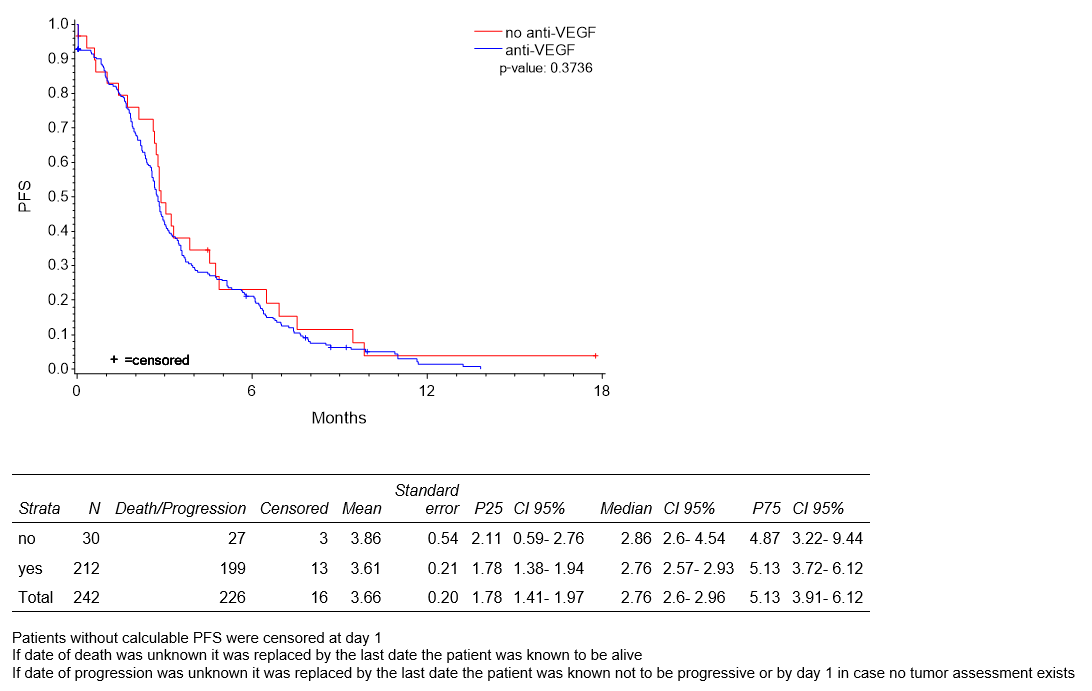

Supplement: Supplementary file 1 [file 28089567]
